# Supplementary material for: Salicornia europaea L. Functional Traits Indicate Its Optimum Growth
Source: MDPI journal article supplement (doi:10.3390/plants11081051), 2022-04-12
Supplement: s1 [file s1]

## *Salicornia europaea* L. Functional Traits Indicate Its Optimum Growth

Stefany Cárdenas-Pérez et al.

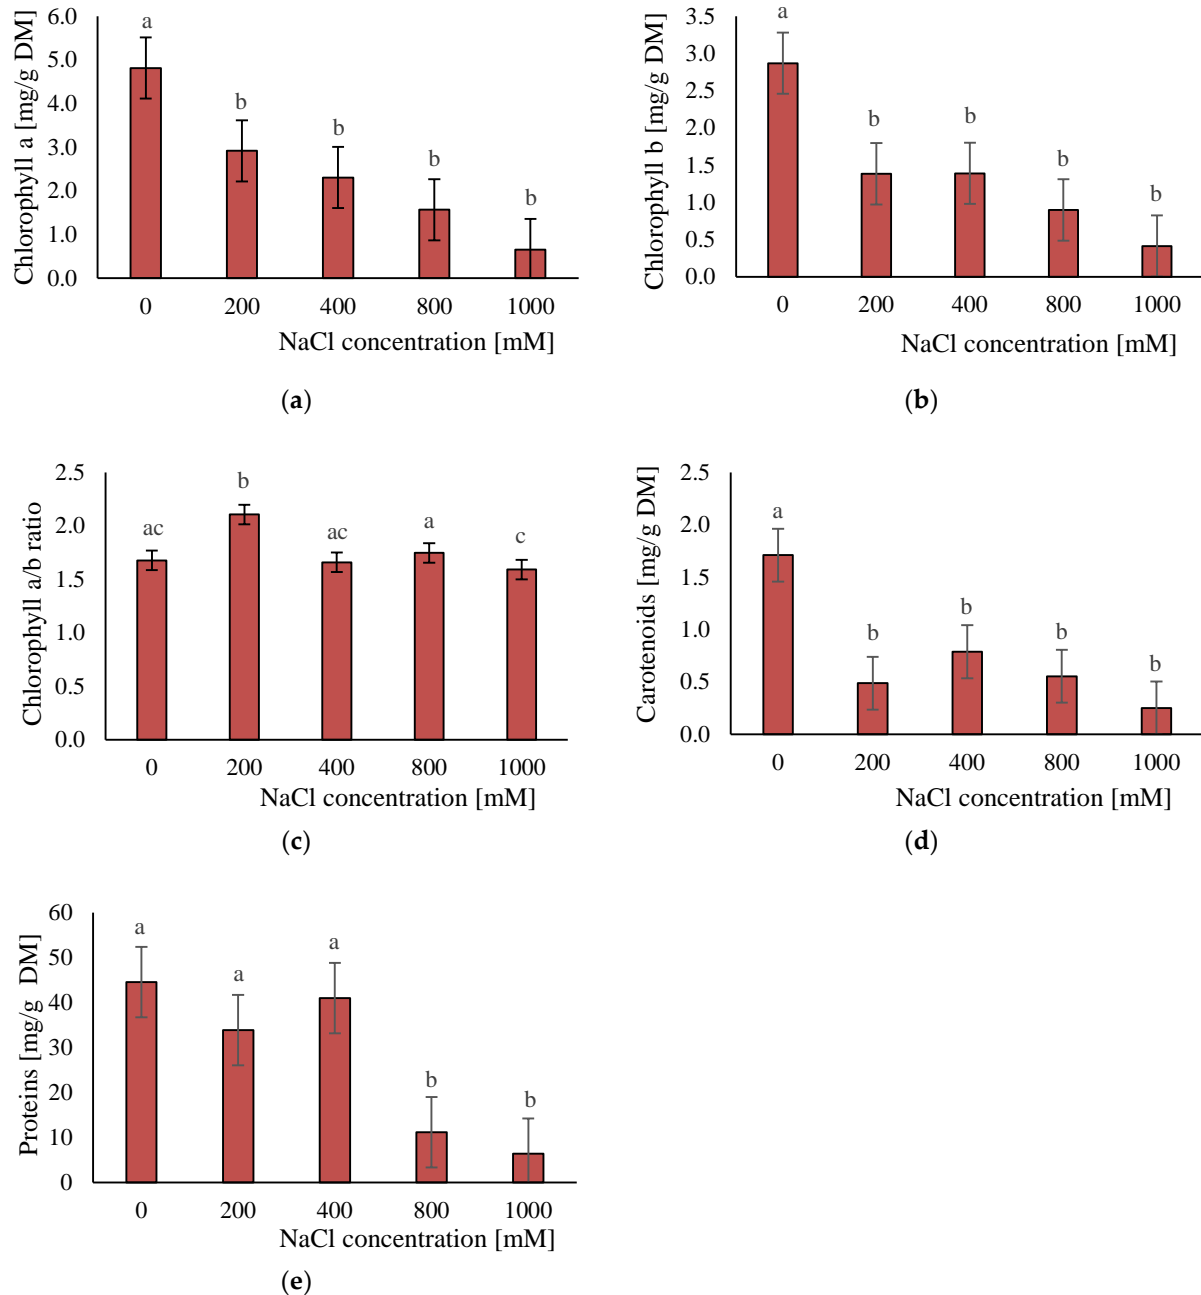

**Figure S1.** The average concentration of: (a) chlorophyll a; (b) chlorophyll b; (c) chlorophyll a/b ratio, (d) carotenoid and (e) soluble proteins in the tested plants;  $\pm$  SD in the tested samples. ANOVA  $p < 0.001$ , significant differences based on post hoc Tukey's test are marked with different letters. Dry mass (DM) was applied as reference base.

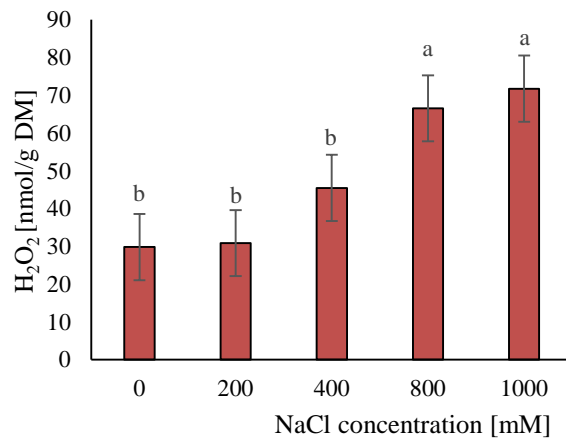

(a)

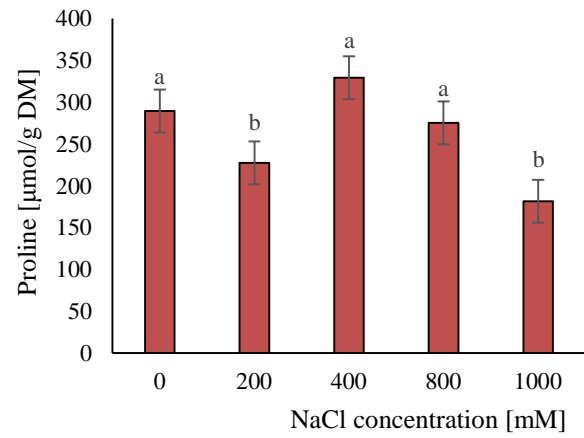

(b)

**Figure S2.** The average parameters of: (a) H<sub>2</sub>O<sub>2</sub> content; (b) proline content in the tested plants;  $\pm$  SD in the tested samples. ANOVA  $p < 0.001$ , significant differences based on post hoc Tukey's test are marked with different letters. Dry mass (DM) was applied as reference base.
